# Supplementary material
Source: publisher figshare collection journal article supplement (https://tandf.figshare.com/articles/dataset/_/5817840)

Supplementary Figure A. Example of a epoch with and without artifacts on left central montage of the anger cue condition in a TS patient.

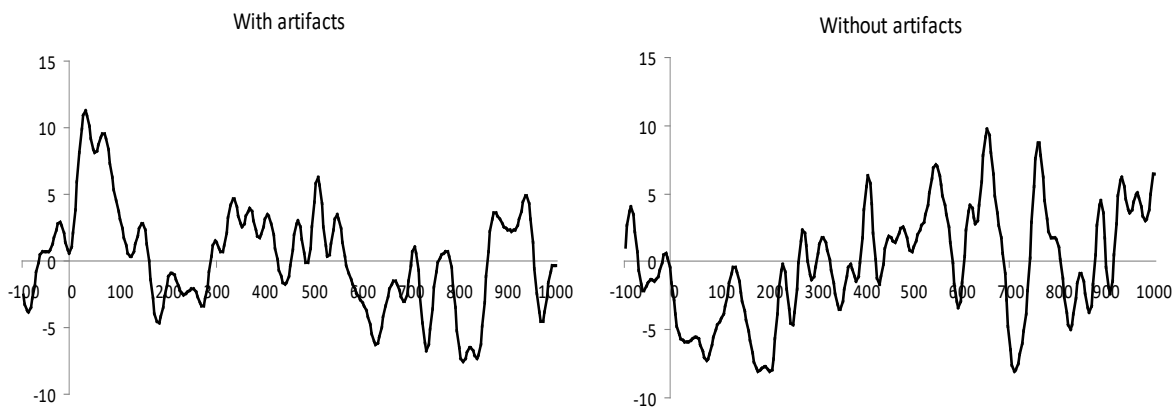

Supplement: Supplementary file 1 [file 2]
