# Supplementary material
Source: publisher figshare collection journal article supplement (https://tandf.figshare.com/articles/dataset/_/5817840)
Supplement: Supplementary file 2 [file 2]

Supplementary Table A. Mean (M) and standard deviation (SD) trials for each condition included in the analyses in TS patients and control group.

| Condition                                  | TS Patients<br>M $\pm$ SD | Control group<br>M $\pm$ SD |
|--------------------------------------------|---------------------------|-----------------------------|
| Anger cue                                  | 40 $\pm$ 8                | 39 $\pm$ 8                  |
| Happiness cue                              | 35 $\pm$ 9                | 39 $\pm$ 10                 |
| Sadness cue                                | 37 $\pm$ 12               | 38 $\pm$ 9                  |
| Neutral cue                                | 36 $\pm$ 11               | 38 $\pm$ 12                 |
| Congruent target linked to Anger cue       | 32 $\pm$ 7                | 33 $\pm$ 6                  |
| Congruent target linked to Happiness cue   | 28 $\pm$ 7                | 31 $\pm$ 8                  |
| Congruent target linked to Sadness cue     | 29 $\pm$ 10               | 31 $\pm$ 8                  |
| Congruent target linked to Neutral cue     | 30 $\pm$ 9                | 31 $\pm$ 8                  |
| Incongruent target linked to Anger cue     | 7 $\pm$ 3                 | 6 $\pm$ 2                   |
| Incongruent target linked to Happiness cue | 7 $\pm$ 2                 | 8 $\pm$ 3                   |
| Incongruent target linked to Sadness cue   | 8 $\pm$ 3                 | 7 $\pm$ 2                   |
| Incongruent target linked to Neutral cue   | 6 $\pm$ 2                 | 7 $\pm$ 3                   |
| No-response target linked to Anger cue     | 10 $\pm$ 3                | 11 $\pm$ 2                  |
| No-response target linked to Happiness cue | 9 $\pm$ 3                 | 11 $\pm$ 2                  |
| No-response target linked to Sadness cue   | 10 $\pm$ 3                | 10 $\pm$ 2                  |
| No-response target linked to Neutral cue   | 9 $\pm$ 3                 | 10 $\pm$ 3                  |
